# Supplementary material
Source: publisher figshare collection journal article supplement (https://gsapubs.figshare.com/articles/dataset/_/24119295)
Supplement: Supplementary file 1 [file 1]

## Sheet: List1
Analysis	1	2	3	4	5	6	7	8	9	10	11	12	13	14	15	16	17	18	19	20	21	22	23	24	25	26	27	28	29	30	31	32	33
Rock-sample	KS05A	KS05A	KS05A	KS05A	KS05A	KS05A	KS05A	KS05A	KS05A	KS05A	KS05A	KS05A	KS05A	KS05B	KS05B	KS05B	KS05B	KS05B	KS05C	KS05C	KS05C	KS05C	KS05C	KS05C	KS05C	KS05C	KS05D	KS05D	KS05D	KS05D	KS05D	KS05D	KS05D
mineral	calcite	calcite	calcite	calcite	calcite	calcite	calcite	dolomite	calcite	calcite	calcite	calcite	calcite	calcite	calcite	calcite	calcite	calcite	calcite	calcite	calcite	calcite	calcite	calcite	calcite	calcite	calcite	calcite	calcite	calcite	calcite	calcite	calcite
type	L-x	L-x	L-g	L-g	L-g	L-g	C	C	L-g	C	C	L-p	L-p	L-g	L-g	C	C	C	L-x	L-g	C	L-x	L-p	L-p	L-p	C	L-p	L-p	L-p	C	L-p	L-g	C
FeO																			0.14
MgO	0.26	1.06					0.2	17.52		0.12				0.11		0.31	0.35		0.92		1.09	1.16				0.22	0.15	0.13		0.87	0.11		0.23
CaO	54.12	53.26	53.47	54.01	53.94	53.33	54.68	32.43	54.1	54.1	53.72	54.27	51.26	54.05	52.37	53.19	53.27	54.28	52.82	52.63	52.19	53.31	53.07	52.49	50.29	54.16	52.52	52.34	51.4	52.6	52.41	51.98	52.42
SrO			1.23	1.09	1.34	1.28		0.53	1.14			1.34	1	0.96	1.18					1.1			1.19	1.21	1.83	0.14	0.98	0.95	1.41	0	0.94	1.32
BaO																									1.2
Na2O													0.83		0.08										0.1
Total	54.38	54.33	54.7	55.1	55.28	54.61	54.88	50.47	55.25	54.22	53.72	55.61	53.09	55.12	53.62	53.5	53.63	54.28	53.88	53.73	53.28	54.47	54.27	53.7	53.41	54.51	53.65	53.42	52.8	53.47	53.46	53.3	52.65
type: L-p - phenocryst in lapilli; L-g - lapilli groundmass; L-x - glomerocryst with non-carbonate mineral phase; C - cement in between lapilli
