# Supplementary material
Source: publisher figshare collection journal article supplement (https://gsapubs.figshare.com/articles/dataset/_/24119295)
Supplement: Supplementary file 1 [file 1]

Rapprich, V., Walter, B.F., Kopačková-Strnadová, V., Kluge, T., Čejková, B., Pour, O., Hora, J.M., Kynický, J., and Magna, T., 2023, Gravitational collapse of a volcano edifice as a trigger for explosive carbonatite eruption?: GSA Bulletin, <https://doi.org/10.1130/B37013.1>.

## Supplemental Material

**Table S1.** Mineral chemistry data of analyzed carbonates from studied carbonatite pyroclastic deposits
